# Supplementary material for: The effectiveness of dry needling in patients with chronic low back pain: a prospective, randomized, single-blinded study
Source: PubMed Central journal article supplement (PMC9500077; doi:10.1038/s41598-022-19980-1), 2022-09-22
Supplement: 41598_2022_19980_MOESM1_ESM.pdf [file 41598_2022_19980_MOESM1_ESM.pdf]

**Supplementary Table 1.** The VAS scores in both groups (repeated measures ANOVA).

| Variable       | Measure        | Experimental group (n=20) |      |      |       |      |      |     | Control group (n=20) |      |      |       |      |      |     | <i>p</i> <sup>*</sup><br><i>Group</i> | <i>p</i> <sup>*</sup><br><i>Measure</i> | <i>p</i> <sup>*</sup><br><i>Group x</i><br><i>Measure</i> | Eta <sup>2</sup> | Cohen<br>f |
|----------------|----------------|---------------------------|------|------|-------|------|------|-----|----------------------|------|------|-------|------|------|-----|---------------------------------------|-----------------------------------------|-----------------------------------------------------------|------------------|------------|
|                |                | $\bar{x}$                 | Me   | Min  | Max   | Q1   | Q3   | SD  | $\bar{x}$            | Me   | Min  | Max   | Q1   | Q3   | SD  |                                       |                                         |                                                           |                  |            |
| VAS<br>[score] | Before         | 8.10                      | 8.00 | 7.00 | 10.00 | 7.50 | 9.00 | 0.9 | 8.15                 | 8.00 | 7.00 | 10.00 | 7.00 | 9.00 | 1.0 | <0.001                                | <0.001                                  | <0.001                                                    | 0.57             | 1.12       |
|                | After          | 1.65                      | 1.50 | 1.00 | 5.00  | 1.00 | 2.00 | 0.9 | 5.90                 | 6.00 | 4.00 | 7.00  | 5.00 | 7.00 | 1.1 |                                       |                                         |                                                           |                  |            |
|                | 1 month<br>FU  | 1.90                      | 1.50 | 1.00 | 6.00  | 1.00 | 2.00 | 1.4 | 8.25                 | 8.00 | 7.00 | 10.00 | 7.50 | 9.00 | 1.0 |                                       |                                         |                                                           |                  |            |
|                | 3 months<br>FU | 2.10                      | 1.50 | 1.00 | 7.00  | 1.00 | 3.00 | 1.6 | 8.20                 | 8.00 | 6.00 | 10.00 | 7.50 | 9.00 | 1.1 |                                       |                                         |                                                           |                  |            |

**Abbreviations:** n – number of individuals;  $\bar{x}$  – mean; Me – median; Min – minimum value; Max – maximum value; Q1 – lower quartile; Q3 – upper quartile; SD – standard deviation; FU – follow-up. **Notes:** \*repeated measures ANOVA.

**Supplementary Table 2.** The ODI scores in both groups (repeated measures ANOVA).

| Variable                                                                                                                                                                                                                                                               | Measure        | Experimental group (n=20) |      |      |      |      |      |     | Control group (n=20) |      |      |      |      |      |     | <i>p*</i><br><i>Group</i> | <i>p*</i><br><i>Measure</i> | <i>p*</i><br><i>Group x</i><br><i>Measure</i> | Eta <sup>2</sup> | Cohen<br>f |
|------------------------------------------------------------------------------------------------------------------------------------------------------------------------------------------------------------------------------------------------------------------------|----------------|---------------------------|------|------|------|------|------|-----|----------------------|------|------|------|------|------|-----|---------------------------|-----------------------------|-----------------------------------------------|------------------|------------|
|                                                                                                                                                                                                                                                                        |                | $\bar{x}$                 | Me   | Min  | Max  | Q1   | Q3   | SD  | $\bar{x}$            | Me   | Min  | Max  | Q1   | Q3   | SD  |                           |                             |                                               |                  |            |
| ODI<br>[score]                                                                                                                                                                                                                                                         | Before         | 36.0                      | 35.5 | 29.0 | 47.0 | 33.0 | 38.0 | 4.5 | 39.0                 | 41.0 | 29.0 | 50.0 | 33.0 | 43.5 | 7.3 | <0.001                    | <0.001                      | <0.001                                        | 0.24             | 0.54       |
|                                                                                                                                                                                                                                                                        | After          | 17.9                      | 14.5 | 9.0  | 31.0 | 12.0 | 23.5 | 7.4 | 36.1                 | 34.0 | 28.0 | 50.0 | 29.5 | 41.5 | 6.7 |                           |                             |                                               |                  |            |
|                                                                                                                                                                                                                                                                        | 1 month<br>FU  | 17.1                      | 14.0 | 9.0  | 31.0 | 12.0 | 23.0 | 7.0 | 38.4                 | 39.0 | 29.0 | 50.0 | 31.0 | 43.5 | 7.4 |                           |                             |                                               |                  |            |
|                                                                                                                                                                                                                                                                        | 3 months<br>FU | 18.4                      | 16.0 | 11.0 | 31.0 | 12.0 | 25.0 | 6.9 | 39.0                 | 39.5 | 29.0 | 50.0 | 33.0 | 43.5 | 6.9 |                           |                             |                                               |                  |            |
| <p><b>Abbreviations:</b> n – number of individuals; <math>\bar{x}</math> – mean; Me – median; Min – minimum value; Max – maximum value; Q1 – lower quartile; Q3 – upper quartile; SD – standard deviation; FU – follow-up. <b>Notes:</b> *repeated measures ANOVA.</p> |                |                           |      |      |      |      |      |     |                      |      |      |      |      |      |     |                           |                             |                                               |                  |            |

**Supplementary Table 3.** The Schober's test results in both groups (repeated measures ANOVA).

| Variable                                                                                                                                                                                                                                                               | Measure        | Experimental group (n=20) |      |      |      |      |      |     | Control group (n=20) |      |      |      |      |      |     | <i>p</i> <sup>*</sup><br><i>Group</i> | <i>p</i> <sup>*</sup><br><i>Measure</i> | <i>p</i> <sup>*</sup><br><i>Group x</i><br><i>Measure</i> | Eta <sup>2</sup> | Cohen<br>f |
|------------------------------------------------------------------------------------------------------------------------------------------------------------------------------------------------------------------------------------------------------------------------|----------------|---------------------------|------|------|------|------|------|-----|----------------------|------|------|------|------|------|-----|---------------------------------------|-----------------------------------------|-----------------------------------------------------------|------------------|------------|
|                                                                                                                                                                                                                                                                        |                | $\bar{x}$                 | Me   | Min  | Max  | Q1   | Q3   | SD  | $\bar{x}$            | Me   | Min  | Max  | Q1   | Q3   | SD  |                                       |                                         |                                                           |                  |            |
| Shober's<br>test [cm]                                                                                                                                                                                                                                                  | Before         | 3.00                      | 3.00 | 2.00 | 4.00 | 3.00 | 3.00 | 0.6 | 2.80                 | 3.00 | 2.00 | 4.00 | 2.25 | 3.00 | 0.7 | <0.001                                | <0.001                                  | <0.001                                                    | 0.26             | 0.58       |
|                                                                                                                                                                                                                                                                        | After          | 4.80                      | 5.00 | 4.00 | 6.00 | 4.00 | 5.00 | 0.6 | 2.65                 | 2.50 | 2.00 | 4.00 | 2.00 | 3.00 | 0.6 |                                       |                                         |                                                           |                  |            |
|                                                                                                                                                                                                                                                                        | 1 month<br>FU  | 4.70                      | 5.00 | 4.00 | 6.00 | 4.00 | 5.00 | 0.7 | 2.88                 | 3.00 | 2.00 | 4.00 | 2.50 | 3.00 | 0.6 |                                       |                                         |                                                           |                  |            |
|                                                                                                                                                                                                                                                                        | 3 months<br>FU | 4.50                      | 4.00 | 3.00 | 6.00 | 4.00 | 5.00 | 0.8 | 2.65                 | 2.50 | 2.00 | 4.00 | 2.00 | 3.00 | 0.7 |                                       |                                         |                                                           |                  |            |
| <p><b>Abbreviations:</b> n – number of individuals; <math>\bar{x}</math> – mean; Me – median; Min – minimum value; Max – maximum value; Q1 – lower quartile; Q3 – upper quartile; SD – standard deviation; FU – follow-up. <b>Notes:</b> *repeated measures ANOVA.</p> |                |                           |      |      |      |      |      |     |                      |      |      |      |      |      |     |                                       |                                         |                                                           |                  |            |
